# Supplementary material for: Early neonatal acquisition of extended-spectrum beta-lactamase (ESBL)-producing Enterobacterales in Madagascar and Cambodia: clonal and plasmid-level contributions of maternal gut carriage
Source: Research Square preprint supplement (doi:10.21203/rs.3.rs-6271227/v1), 2025-04-14
Supplement: Supplementary file 1 [file 6d92268a89fbbc0bb32f782a.xlsx]

## Sheet: Sequences_info
Identification	Identification	Identification	Identification	In silico taxonomy and typing	In silico taxonomy and typing	In silico taxonomy and typing	Accession Number	Accession Number	Accession Number
Strain	Country	Study project	Sample_origin	Species	Typing_Scheme	Sequence_Type	run_accession	assembly_accession	contigs_accession
C-K366-B	Cambodia	peecnic	neonate	Citrobacter freundii	cfreundii	404	ERR14660665	GCA_965178865	CBCXYD010000001-CBCXYD010000122
M-A079-B	Madagascar	birdy2	neonate	Citrobacter freundii	cfreundii	95	ERR14660768	GCA_965180605	CBCYDN010000001-CBCYDN010000118
M-M088-M	Madagascar	birdy2	mum	Citrobacter freundii	cfreundii	95	ERR14660790	GCA_965182435	CBCYKI010000001-CBCYKI010000216
M-M100-B.2	Madagascar	birdy2	neonate	Citrobacter freundii	cfreundii	95	ERR14660792	GCA_965182425	CBCYKS010000001-CBCYKS010000110
M-M109-B.1	Madagascar	birdy2	neonate	Citrobacter freundii	cfreundii	62	ERR14660805	GCA_965181425	CBCYGZ010000001-CBCYGZ010000070
M-M205-B.1	Madagascar	birdy2	neonate	Citrobacter freundii	cfreundii	95	ERR14660834	GCA_965183365	CBDACI010000001-CBDACI010000113
M-M205-B.2	Madagascar	birdy2	neonate	Citrobacter freundii	cfreundii	95	ERR14660835	GCA_965181145	CBCYGC010000001-CBCYGC010000111
C-K429-B	Cambodia	peecnic	neonate	Citrobacter portucalensis	cfreundii	674	ERR14660709	GCA_965179565	CBCXYL010000001-CBCXYL010000086
M-A221-M	Madagascar	birdy2	mum	Citrobacter portucalensis	cfreundii	9-247-4-7-47-8-172	ERR14660775	GCA_965181495	CBCYHB010000001-CBCYHB010000137
C-K363-B	Cambodia	peecnic	neonate	Citrobacter sedlakii	cfreundii	696	ERR14660661	GCA_965179275	CBCXWX010000001-CBCXWX010000103
M-A079-M	Madagascar	birdy2	mum	Citrobacter sedlakii	cfreundii	286-352-265-205-133-196-236	ERR14660769	GCA_965181595	CBCYHD010000001-CBCYHD010000041
M-M123-B	Madagascar	birdy2	neonate	Enterobacter asburiae	ecloacae	24-173-287-191-563-11-15	ERR14660813	GCA_965183605	CBDACU010000001-CBDACU010000056
M-A047-B	Madagascar	birdy2	neonate	Enterobacter rongchengensis	ecloacae	1065	ERR14660766	GCA_965180615	CBCYDM010000001-CBCYDM010000132
M-M110-B	Madagascar	birdy2	neonate	Enterobacter rongchengensis	ecloacae	666	ERR14660809	GCA_965182765	CBCYLN010000001-CBCYLN010000088
C-K360-B	Cambodia	peecnic	neonate	Enterobacter intestinihominis	ecloacae	171	ERR14660659	GCA_965179095	CBCXXB010000001-CBCXXB010000046
C-K380-B	Cambodia	peecnic	neonate	Enterobacter intestinihominis	ecloacae	479	ERR14660676	GCA_965179505	CBCXXC010000001-CBCXXC010000051
C-K387-B.1	Cambodia	peecnic	neonate	Enterobacter intestinihominis	ecloacae	923	ERR14660684	GCA_965179325	CBCXWY010000001-CBCXWY010000050
C-K414-B	Cambodia	peecnic	neonate	Enterobacter intestinihominis	ecloacae	544	ERR14660700	GCA_965179315	CBCXXQ010000001-CBCXXQ010000055
C-K431-B	Cambodia	peecnic	neonate	Enterobacter intestinihominis	ecloacae	544	ERR14660713	GCA_965179405	CBCXXO010000001-CBCXXO010000055
C-P321-B	Cambodia	peecnic	neonate	Enterobacter intestinihominis	ecloacae	923	ERR14660730	GCA_965180825	CBCYEC010000001-CBCYEC010000042
M-M088-B.1	Madagascar	birdy2	neonate	Enterobacter intestinihominis	ecloacae	148	ERR14660788	GCA_965180165	CBCYBJ010000001-CBCYBJ010000079
M-M100-B.1	Madagascar	birdy2	neonate	Enterobacter intestinihominis	ecloacae	2967	ERR14660791	GCA_965179885	CBCYAX010000001-CBCYAX010000063
M-M101-M.1	Madagascar	birdy2	mum	Enterobacter intestinihominis	ecloacae	-	ERR14660796	GCA_965181865	CBCYIH010000001-CBCYIH010000066
M-M101-M.2	Madagascar	birdy2	mum	Enterobacter intestinihominis	ecloacae	50	ERR14660797	GCA_965182295	CBCYJV010000001-CBCYJV010000080
M-M108-B.2	Madagascar	birdy2	neonate	Enterobacter intestinihominis	ecloacae	50	ERR14660802	GCA_965182855	CBCYMX010000001-CBCYMX010000070
M-M134-B	Madagascar	birdy2	neonate	Enterobacter intestinihominis	ecloacae	113	ERR14660815	GCA_965183645	CBDACH010000001-CBDACH010000029
M-M144-B.1	Madagascar	birdy2	neonate	Enterobacter intestinihominis	ecloacae	134	ERR14660820	GCA_965183315	CBDABU010000001-CBDABU010000081
M-M144-B.2	Madagascar	birdy2	neonate	Enterobacter intestinihominis	ecloacae	2895	ERR14660821	GCA_965183425	CBDABZ010000001-CBDABZ010000057
M-M205-M	Madagascar	birdy2	mum	Enterobacter intestinihominis	ecloacae	2895	ERR14660836	GCA_965182085	CBCYJI010000001-CBCYJI010000070
M-M259-B	Madagascar	birdy2	neonate	Enterobacter intestinihominis	ecloacae	-	ERR14660837	GCA_965181195	CBCYFE010000001-CBCYFE010000062
M-M259-M	Madagascar	birdy2	mum	Enterobacter intestinihominis	ecloacae	-	ERR14660838	GCA_965179735	CBCXZP010000001-CBCXZP010000060
M-Mo181-B	Madagascar	neolic	neonate	Enterobacter intestinihominis	ecloacae	93	ERR14660873	GCA_965182035	CBCYIV010000001-CBCYIV010000046
M-M052-B.2	Madagascar	birdy2	neonate	Enterobacter kobei	ecloacae	32	ERR14660781	GCA_965183575	CBDADB010000001-CBDADB010000118
M-M052-M.1	Madagascar	birdy2	mum	Enterobacter kobei	ecloacae	32	ERR14660782	GCA_965180355	CBCYCV010000001-CBCYCV010000114
C-K349-B	Cambodia	peecnic	neonate	Escherichia coli	ecoli_achtman_4	-	ERR14660475	GCA_965179345	CBCXYF010000001-CBCXYF010000340
C-K349-M	Cambodia	peecnic	mum	Escherichia coli	ecoli_achtman_4	2346	ERR14660651	GCA_965178815	CBCXXP010000001-CBCXXP010000170
C-K353-B.1	Cambodia	peecnic	neonate	Escherichia coli	ecoli_achtman_4	44	ERR14660652	GCA_965179235	CBCXXH010000001-CBCXXH010000283
C-K353-M	Cambodia	peecnic	mum	Escherichia coli	ecoli_achtman_4	10	ERR14660654	GCA_965178785	CBCXWV010000001-CBCXWV010000055
C-K354-B	Cambodia	peecnic	neonate	Escherichia coli	ecoli_achtman_4	648	ERR14660655	GCA_965179165	CBCXYI010000001-CBCXYI010000295
C-K354-M	Cambodia	peecnic	mum	Escherichia coli	ecoli_achtman_4	226	ERR14660656	GCA_965179065	CBCXWQ010000001-CBCXWQ010000127
C-K358-B	Cambodia	peecnic	neonate	Escherichia coli	ecoli_achtman_4	131	ERR14660657	GCA_965179055	CBCXYQ010000001-CBCXYQ010000270
C-K358-M	Cambodia	peecnic	mum	Escherichia coli	ecoli_achtman_4	131	ERR14660658	GCA_965178975	CBCXYX010000001-CBCXYX010000242
C-K360-M	Cambodia	peecnic	mum	Escherichia coli	ecoli_achtman_4	38	ERR14660660	GCA_965179075	CBCXXF010000001-CBCXXF010000071
C-K363-M	Cambodia	peecnic	mum	Escherichia coli	ecoli_achtman_4	665	ERR14660662	GCA_965178855	CBCXWP010000001-CBCXWP010000076
C-K365-B	Cambodia	peecnic	neonate	Escherichia coli	ecoli_achtman_4	10	ERR14660663	GCA_965178955	CBCXWU010000001-CBCXWU010000152
C-K365-M	Cambodia	peecnic	mum	Escherichia coli	ecoli_achtman_4	2325	ERR14660664	GCA_965178905	CBCXWM010000001-CBCXWM010000150
C-K366-M	Cambodia	peecnic	mum	Escherichia coli	ecoli_achtman_4	131	ERR14660666	GCA_965179475	CBCXYN010000001-CBCXYN010000094
C-K372-B.2	Cambodia	peecnic	neonate	Escherichia coli	ecoli_achtman_4	93	ERR14660670	GCA_965179555	CBCXXW010000001-CBCXXW010000231
C-K372-M	Cambodia	peecnic	mum	Escherichia coli	ecoli_achtman_4	3268	ERR14660671	GCA_965179395	CBCXXZ010000001-CBCXXZ010000086
C-K373-B	Cambodia	peecnic	neonate	Escherichia coli	ecoli_achtman_4	2280	ERR14660672	GCA_965179375	CBCXXA010000001-CBCXXA010000098
C-K373-M	Cambodia	peecnic	mum	Escherichia coli	ecoli_achtman_4	648	ERR14660673	GCA_965178935	CBCXYZ010000001-CBCXYZ010000159
C-K374-M	Cambodia	peecnic	mum	Escherichia coli	ecoli_achtman_4	3045	ERR14660675	GCA_965179455	CBCXYA010000001-CBCXYA010000116
C-K380-M	Cambodia	peecnic	mum	Escherichia coli	ecoli_achtman_4	6361	ERR14660677	GCA_965179415	CBCXXX010000001-CBCXXX010000121
C-K385-B.2	Cambodia	peecnic	neonate	Escherichia coli	ecoli_achtman_4	156	ERR14660681	GCA_965179265	CBCXXE010000001-CBCXXE010000114
C-K385-B.3	Cambodia	peecnic	neonate	Escherichia coli	ecoli_achtman_4	156	ERR14660682	GCA_965179335	CBCXXN010000001-CBCXXN010000088
C-K385-M	Cambodia	peecnic	mum	Escherichia coli	ecoli_achtman_4	156	ERR14660683	GCA_965179295	CBCXXR010000001-CBCXXR010000137
C-K387-M	Cambodia	peecnic	mum	Escherichia coli	ecoli_achtman_4	200	ERR14660686	GCA_965179515	CBCXZI010000001-CBCXZI010000204
C-K390-B.1	Cambodia	peecnic	neonate	Escherichia coli	ecoli_achtman_4	131	ERR14660687	GCA_965178795	CBCXZB010000001-CBCXZB010000144
C-K390-B.2	Cambodia	peecnic	neonate	Escherichia coli	ecoli_achtman_4	131	ERR14660688	GCA_965179185	CBCXYO010000001-CBCXYO010000115
C-K390-M	Cambodia	peecnic	mum	Escherichia coli	ecoli_achtman_4	10	ERR14660689	GCA_965178805	CBCXXV010000001-CBCXXV010000187
C-K392-M	Cambodia	peecnic	mum	Escherichia coli	ecoli_achtman_4	10	ERR14660691	GCA_965179535	CBCXYY010000001-CBCXYY010000199
C-K397-B	Cambodia	peecnic	neonate	Escherichia coli	ecoli_achtman_4	95	ERR14660692	GCA_965179005	CBCXYV010000001-CBCXYV010000127
C-K397-M	Cambodia	peecnic	mum	Escherichia coli	ecoli_achtman_4	69	ERR14660693	GCA_965178835	CBCXZF010000001-CBCXZF010000336
C-K401-B	Cambodia	peecnic	neonate	Escherichia coli	ecoli_achtman_4	131	ERR14660696	GCA_965178945	CBCXYU010000001-CBCXYU010000129
C-K401-M	Cambodia	peecnic	mum	Escherichia coli	ecoli_achtman_4	3268	ERR14660697	GCA_965178985	CBCXWR010000001-CBCXWR010000176
C-K405-B	Cambodia	peecnic	neonate	Escherichia coli	ecoli_achtman_4	1193	ERR14660698	GCA_965179125	CBCXYC010000001-CBCXYC010000090
C-K405-M	Cambodia	peecnic	mum	Escherichia coli	ecoli_achtman_4	6143	ERR14660699	GCA_965178875	CBCXXI010000001-CBCXXI010000197
C-K416-B	Cambodia	peecnic	neonate	Escherichia coli	ecoli_achtman_4	131	ERR14660703	GCA_965179385	CBCXYG010000001-CBCXYG010000144
C-K416-M	Cambodia	peecnic	mum	Escherichia coli	ecoli_achtman_4	131	ERR14660704	GCA_965179425	CBCXZC010000001-CBCXZC010000128
C-K423-B	Cambodia	peecnic	neonate	Escherichia coli	ecoli_achtman_4	10	ERR14660705	GCA_965179225	CBCXWT010000001-CBCXWT010000103
C-K423-M	Cambodia	peecnic	mum	Escherichia coli	ecoli_achtman_4	421	ERR14660706	GCA_965179445	CBCXYW010000001-CBCXYW010000256
C-K424-M	Cambodia	peecnic	mum	Escherichia coli	ecoli_achtman_4	58	ERR14660708	GCA_965179435	CBCXXJ010000001-CBCXXJ010000085
C-K430-B	Cambodia	peecnic	neonate	Escherichia coli	ecoli_achtman_4	10	ERR14660711	GCA_965179365	CBCXZJ010000001-CBCXZJ010000218
C-K430-M	Cambodia	peecnic	mum	Escherichia coli	ecoli_achtman_4	224	ERR14660712	GCA_965179465	CBCXXM010000001-CBCXXM010000076
C-K431-M	Cambodia	peecnic	mum	Escherichia coli	ecoli_achtman_4	196	ERR14660714	GCA_965179155	CBCXXD010000001-CBCXXD010000075
C-K434-B	Cambodia	peecnic	neonate	Escherichia coli	ecoli_achtman_4	226	ERR14660715	GCA_965179205	CBCXWW010000001-CBCXWW010000123
C-K434-M	Cambodia	peecnic	mum	Escherichia coli	ecoli_achtman_4	2076	ERR14660716	GCA_965179175	CBCXZA010000001-CBCXZA010000363
C-K443-M	Cambodia	peecnic	mum	Escherichia coli	ecoli_achtman_4	7394	ERR14660718	GCA_965179545	CBCXYH010000001-CBCXYH010000088
C-K445-B.2	Cambodia	peecnic	neonate	Escherichia coli	ecoli_achtman_4	226	ERR14660720	GCA_965178765	CBCXWL010000001-CBCXWL010000128
C-K445-M	Cambodia	peecnic	mum	Escherichia coli	ecoli_achtman_4	3052	ERR14660721	GCA_965178775	CBCXWS010000001-CBCXWS010000110
C-P273-B	Cambodia	peecnic	neonate	Escherichia coli	ecoli_achtman_4	7590	ERR14660722	GCA_965179215	CBCXWZ010000001-CBCXWZ010000107
C-P273-M	Cambodia	peecnic	mum	Escherichia coli	ecoli_achtman_4	7590	ERR2538183	GCA_965178555	CBCXWJ010000001-CBCXWJ010000131
C-P277-B	Cambodia	peecnic	neonate	Escherichia coli	ecoli_achtman_4	141	ERR14660723	GCA_965179525	CBCXXS010000001-CBCXXS010000131
C-P277-M	Cambodia	peecnic	mum	Escherichia coli	ecoli_achtman_4	540	ERR14660724	GCA_965179195	CBCXXK010000001-CBCXXK010000130
C-P290-M	Cambodia	peecnic	mum	Escherichia coli	ecoli_achtman_4	38	ERR2538190	GCA_965178885	CBCXXT010000001-CBCXXT010000155
C-P302-B	Cambodia	peecnic	neonate	Escherichia coli	ecoli_achtman_4	10	ERR14660726	GCA_965179115	CBCXXG010000001-CBCXXG010000131
C-P302-M	Cambodia	peecnic	mum	Escherichia coli	ecoli_achtman_4	5044	ERR2538195	GCA_965179105	CBCXWN010000001-CBCXWN010000176
C-P311-M	Cambodia	peecnic	mum	Escherichia coli	ecoli_achtman_4	3045	ERR14660728	GCA_965179025	CBCXXL010000001-CBCXXL010000116
C-P313-B	Cambodia	peecnic	neonate	Escherichia coli	ecoli_achtman_4	969	ERR14660729	GCA_965178845	CBCXYE010000001-CBCXYE010000134
C-P313-M	Cambodia	peecnic	mum	Escherichia coli	ecoli_achtman_4	969	ERR2538198	GCA_965182065	CBCYJQ010000001-CBCYJQ010000219
C-P321-M	Cambodia	peecnic	mum	Escherichia coli	ecoli_achtman_4	38	ERR14661167	GCA_965182055	CBCYJD010000001-CBCYJD010000073
C-P327-B.2	Cambodia	peecnic	neonate	Escherichia coli	ecoli_achtman_4	216	ERR14660732	GCA_965180805	CBCYDX010000001-CBCYDX010000119
C-P327-M	Cambodia	peecnic	mum	Escherichia coli	ecoli_achtman_4	43	ERR2538202	GCA_965180465	CBCYCD010000001-CBCYCD010000185
C-P328-M	Cambodia	peecnic	mum	Escherichia coli	ecoli_achtman_4	6303	ERR2539424	GCA_965180455	CBCYDE010000001-CBCYDE010000201
C-P330-B	Cambodia	peecnic	neonate	Escherichia coli	ecoli_achtman_4	998	ERR14660734	GCA_965180785	CBCYEG010000001-CBCYEG010000126
C-P330-M	Cambodia	peecnic	mum	Escherichia coli	ecoli_achtman_4	998	ERR14660735	GCA_965180445	CBCYCX010000001-CBCYCX010000168
C-P334-B	Cambodia	peecnic	neonate	Escherichia coli	ecoli_achtman_4	131	ERR14660738	GCA_965180435	CBCYDC010000001-CBCYDC010000168
C-P334-M	Cambodia	peecnic	mum	Escherichia coli	ecoli_achtman_4	442	ERR2538204	GCA_965182815	CBCYMN010000001-CBCYMN010000171
C-P337-B	Cambodia	peecnic	neonate	Escherichia coli	ecoli_achtman_4	617	ERR14660739	GCA_965182775	CBCYLP010000001-CBCYLP010000121
C-P337-M	Cambodia	peecnic	mum	Escherichia coli	ecoli_achtman_4	10	ERR14660740	GCA_965183495	CBDACO010000001-CBDACO010000153
C-P339-B.1	Cambodia	peecnic	neonate	Escherichia coli	ecoli_achtman_4	648	ERR14660744	GCA_965182895	CBCYNA010000001-CBCYNA010000182
C-P339-B.2	Cambodia	peecnic	neonate	Escherichia coli	ecoli_achtman_4	648	ERR14660745	GCA_965181315	CBCYGN010000001-CBCYGN010000181
C-P339-M	Cambodia	peecnic	mum	Escherichia coli	ecoli_achtman_4	648	ERR14660746	GCA_965182875	CBCYNC010000001-CBCYNC010000121
C-P342-B	Cambodia	peecnic	neonate	Escherichia coli	ecoli_achtman_4	2040	ERR14660747	GCA_965181305	CBCYFX010000001-CBCYFX010000149
C-P342-M	Cambodia	peecnic	mum	Escherichia coli	ecoli_achtman_4	-	ERR2538207	GCA_965180475	CBCYCH010000001-CBCYCH010000180
C-P348-B	Cambodia	peecnic	neonate	Escherichia coli	ecoli_achtman_4	38	ERR14660748	GCA_965181295	CBCYGL010000001-CBCYGL010000100
C-P348-M	Cambodia	peecnic	mum	Escherichia coli	ecoli_achtman_4	38	ERR2538208	GCA_965180425	CBCYCJ010000001-CBCYCJ010000136
C-P349-B	Cambodia	peecnic	neonate	Escherichia coli	ecoli_achtman_4	196	ERR14660749	GCA_965180415	CBCYBD010000001-CBCYBD010000100
C-P349-M	Cambodia	peecnic	mum	Escherichia coli	ecoli_achtman_4	44	ERR14660750	GCA_965181285	CBCYGI010000001-CBCYGI010000156
C-P352-B.1	Cambodia	peecnic	neonate	Escherichia coli	ecoli_achtman_4	617	ERR14660751	GCA_965180405	CBCYCI010000001-CBCYCI010000131
C-P352-B.2	Cambodia	peecnic	neonate	Escherichia coli	ecoli_achtman_4	58	ERR14660752	GCA_965181275	CBCYFL010000001-CBCYFL010000106
C-P355-B	Cambodia	peecnic	neonate	Escherichia coli	ecoli_achtman_4	10	ERR14660754	GCA_965181265	CBCYFO010000001-CBCYFO010000107
C-P355-M	Cambodia	peecnic	mum	Escherichia coli	ecoli_achtman_4	2003	ERR2538209	GCA_965181255	CBCYGM010000001-CBCYGM010000146
C-P362-B.1	Cambodia	peecnic	neonate	Escherichia coli	ecoli_achtman_4	46	ERR14660757	GCA_965181245	CBCYFG010000001-CBCYFG010000128
C-P362-B.2	Cambodia	peecnic	neonate	Escherichia coli	ecoli_achtman_4	224	ERR14660758	GCA_965182455	CBCYJW010000001-CBCYJW010000101
C-P362-M	Cambodia	peecnic	mum	Escherichia coli	ecoli_achtman_4	2346	ERR14660759	GCA_965181015	CBCYEY010000001-CBCYEY010000206
C-P363-B	Cambodia	peecnic	neonate	Escherichia coli	ecoli_achtman_4	421	ERR14660760	GCA_965182445	CBCYKP010000001-CBCYKP010000184
C-P363-M	Cambodia	peecnic	mum	Escherichia coli	ecoli_achtman_4	69	ERR14660761	GCA_965180645	CBCYDY010000001-CBCYDY010000342
C-P366-B.1	Cambodia	peecnic	neonate	Escherichia coli	ecoli_achtman_4	44	ERR14660762	GCA_965182475	CBCYKM010000001-CBCYKM010000153
C-P366-B.2	Cambodia	peecnic	neonate	Escherichia coli	ecoli_achtman_4	13	ERR14660763	GCA_965180635	CBCYDZ010000001-CBCYDZ010000183
C-P366-M	Cambodia	peecnic	mum	Escherichia coli	ecoli_achtman_4	13	ERR2538212	GCA_965182465	CBCYLE010000001-CBCYLE010000201
C-P368-B	Cambodia	peecnic	neonate	Escherichia coli	ecoli_achtman_4	1722	ERR14660764	GCA_965180625	CBCYDO010000001-CBCYDO010000071
C-P368-M	Cambodia	peecnic	mum	Escherichia coli	ecoli_achtman_4	716	ERR14660765	GCA_965181535	CBCYGR010000001-CBCYGR010000142
M-A156-B	Madagascar	birdy2	neonate	Escherichia coli	ecoli_achtman_4	617	ERR14660770	GCA_965180595	CBCYCR010000001-CBCYCR010000163
M-A156-M	Madagascar	birdy2	mum	Escherichia coli	ecoli_achtman_4	3018	ERR14660771	GCA_965180585	CBCYCF010000001-CBCYCF010000071
M-A157-B	Madagascar	birdy2	neonate	Escherichia coli	ecoli_achtman_4	131	ERR14660772	GCA_965181625	CBCYHM010000001-CBCYHM010000099
M-A157-M	Madagascar	birdy2	mum	Escherichia coli	ecoli_achtman_4	131	ERR14660773	GCA_965180575	CBCYDF010000001-CBCYDF010000152
M-M022-M	Madagascar	birdy2	mum	Escherichia coli	ecoli_achtman_4	131	ERR14660777	GCA_965181475	CBCYGU010000001-CBCYGU010000149
M-M047-M	Madagascar	birdy2	mum	Escherichia coli	ecoli_achtman_4	12780	ERR14660779	GCA_965183595	CBDACB010000001-CBDACB010000179
M-M052-M.2	Madagascar	birdy2	mum	Escherichia coli	ecoli_achtman_4	131	ERR14660783	GCA_965180345	CBCYCS010000001-CBCYCS010000122
M-M071-M.2	Madagascar	birdy2	mum	Escherichia coli	ecoli_achtman_4	12815	ERR14660787	GCA_965183135	CBDAAY010000001-CBDAAY010000093
M-M100-M.1	Madagascar	birdy2	mum	Escherichia coli	ecoli_achtman_4	48	ERR14660793	GCA_965179915	CBCYBL010000001-CBCYBL010000164
M-M104-M.1	Madagascar	birdy2	mum	Escherichia coli	ecoli_achtman_4	3580	ERR14660799	GCA_965182865	CBCYMS010000001-CBCYMS010000092
M-M108-B.1	Madagascar	birdy2	neonate	Escherichia coli	ecoli_achtman_4	224	ERR14660801	GCA_965181885	CBCYIL010000001-CBCYIL010000093
M-M108-M.2	Madagascar	birdy2	mum	Escherichia coli	ecoli_achtman_4	48	ERR14660804	GCA_965182835	CBCYMC010000001-CBCYMC010000140
M-M109-M.1	Madagascar	birdy2	mum	Escherichia coli	ecoli_achtman_4	5044	ERR14660807	GCA_965181415	CBCYGD010000001-CBCYGD010000101
M-M110-M	Madagascar	birdy2	mum	Escherichia coli	ecoli_achtman_4	656	ERR14660810	GCA_965183545	CBDACZ010000001-CBDACZ010000237
M-M111-B	Madagascar	birdy2	neonate	Escherichia coli	ecoli_achtman_4	131	ERR14660811	GCA_965181125	CBCYGA010000001-CBCYGA010000114
M-M111-M	Madagascar	birdy2	mum	Escherichia coli	ecoli_achtman_4	3489	ERR14660812	GCA_965181115	CBCYEW010000001-CBCYEW010000059
M-M123-M	Madagascar	birdy2	mum	Escherichia coli	ecoli_achtman_4	46	ERR14660814	GCA_965181135	CBCYFD010000001-CBCYFD010000111
M-M134-M	Madagascar	birdy2	mum	Escherichia coli	ecoli_achtman_4	656	ERR14660816	GCA_965181105	CBCYFT010000001-CBCYFT010000133
M-M137-M.1	Madagascar	birdy2	mum	Escherichia coli	ecoli_achtman_4	3018	ERR14660818	GCA_965183665	CBDACY010000001-CBDACY010000067
M-M144-M.1	Madagascar	birdy2	mum	Escherichia coli	ecoli_achtman_4	617	ERR14660822	GCA_965180945	CBCYFA010000001-CBCYFA010000132
M-M144-M.2	Madagascar	birdy2	mum	Escherichia coli	ecoli_achtman_4	12822	ERR14660823	GCA_965183465	CBDABS010000001-CBDABS010000196
M-M146-B.1	Madagascar	birdy2	neonate	Escherichia coli	ecoli_achtman_4	656	ERR14660824	GCA_965183445	CBDACN010000001-CBDACN010000124
M-M146-M	Madagascar	birdy2	mum	Escherichia coli	ecoli_achtman_4	656	ERR14660829	GCA_965181525	CBCYHC010000001-CBCYHC010000123
M-M157-M	Madagascar	birdy2	mum	Escherichia coli	ecoli_achtman_4	2852	ERR14660830	GCA_965181515	CBCYGO010000001-CBCYGO010000087
M-M162-M.1	Madagascar	birdy2	mum	Escherichia coli	ecoli_achtman_4	38	ERR14660832	GCA_965183405	CBDABW010000001-CBDABW010000113
M-M271-M.1	Madagascar	birdy2	mum	Escherichia coli	ecoli_achtman_4	617	ERR14660840	GCA_965179795	CBCXZV010000001-CBCXZV010000149
M-Mo056-B.1	Madagascar	neolic	neonate	Escherichia coli	ecoli_achtman_4	131	ERR14660842	GCA_965179665	CBCXZZ010000001-CBCXZZ010000145
M-Mo056-B.2	Madagascar	neolic	neonate	Escherichia coli	ecoli_achtman_4	131	ERR14660843	GCA_965179765	CBCXZY010000001-CBCXZY010000135
M-Mo056-M	Madagascar	neolic	mum	Escherichia coli	ecoli_achtman_4	131	ERR14660844	GCA_965181235	CBCYGH010000001-CBCYGH010000145
M-Mo073-B.2	Madagascar	neolic	neonate	Escherichia coli	ecoli_achtman_4	1598	ERR14660846	GCA_965181225	CBCYFI010000001-CBCYFI010000232
M-Mo073-B.3	Madagascar	neolic	neonate	Escherichia coli	ecoli_achtman_4	1598	ERR14660847	GCA_965181555	CBCYGS010000001-CBCYGS010000228
M-Mo073-M	Madagascar	neolic	mum	Escherichia coli	ecoli_achtman_4	1598	ERR14660849	GCA_965181545	CBCYGQ010000001-CBCYGQ010000222
M-Mo078-B.1	Madagascar	neolic	neonate	Escherichia coli	ecoli_achtman_4	617	ERR14660850	GCA_965182165	CBCYJN010000001-CBCYJN010000181
M-Mo078-B.2	Madagascar	neolic	neonate	Escherichia coli	ecoli_achtman_4	3580	ERR14660851	GCA_965183115	CBCZTW010000001-CBCZTW010000079
M-Mo078-M.1	Madagascar	neolic	mum	Escherichia coli	ecoli_achtman_4	3489	ERR14660854	GCA_965182225	CBCYJG010000001-CBCYJG010000051
M-Mo088-M	Madagascar	neolic	mum	Escherichia coli	ecoli_achtman_4	1722	ERR14660857	GCA_965181185	CBCYFN010000001-CBCYFN010000063
M-Mo142-B	Madagascar	neolic	neonate	Escherichia coli	ecoli_achtman_4	3580	ERR14660858	GCA_965179575	CBCYAA010000001-CBCYAA010000074
M-Mo142-M	Madagascar	neolic	mum	Escherichia coli	ecoli_achtman_4	3580	ERR14660859	GCA_965179705	CBCXZS010000001-CBCXZS010000100
M-Mo172-B.1	Madagascar	neolic	neonate	Escherichia coli	ecoli_achtman_4	2521	ERR14660860	GCA_965183585	CBDACD010000001-CBDACD010000060
M-Mo172-B.2	Madagascar	neolic	neonate	Escherichia coli	ecoli_achtman_4	2521	ERR14660861	GCA_965183565	CBDACK010000001-CBDACK010000061
M-Mo172-M.2	Madagascar	neolic	mum	Escherichia coli	ecoli_achtman_4	2521	ERR14660863	GCA_965183055	CBCZYL010000001-CBCZYL010000054
M-Mo178-B.1	Madagascar	neolic	neonate	Escherichia coli	ecoli_achtman_4	1312	ERR14660865	GCA_965179905	CBCYAN010000001-CBCYAN010000194
M-Mo178-B.2	Madagascar	neolic	neonate	Escherichia coli	ecoli_achtman_4	1312	ERR14660866	GCA_965182205	CBCYJF010000001-CBCYJF010000169
M-Mo178-M	Madagascar	neolic	mum	Escherichia coli	ecoli_achtman_4	1312	ERR14660869	GCA_965180305	CBCYBP010000001-CBCYBP010000161
M-Mo179-B.1	Madagascar	neolic	neonate	Escherichia coli	ecoli_achtman_4	206	ERR14660870	GCA_965180295	CBCYCA010000001-CBCYCA010000147
M-Mo179-B.2	Madagascar	neolic	neonate	Escherichia coli	ecoli_achtman_4	206	ERR14660871	GCA_965182185	CBCYJO010000001-CBCYJO010000156
M-Mo179-M	Madagascar	neolic	mum	Escherichia coli	ecoli_achtman_4	206	ERR14660872	GCA_965182045	CBCYIY010000001-CBCYIY010000164
M-Mo181-M	Madagascar	neolic	mum	Escherichia coli	ecoli_achtman_4	46	ERR14660874	GCA_965182025	CBCYIU010000001-CBCYIU010000108
M-Mo228-B.1	Madagascar	neolic	neonate	Escherichia coli	ecoli_achtman_4	2705	ERR14660875	GCA_965183485	CBDABT010000001-CBDABT010000087
M-Mo228-B.2	Madagascar	neolic	neonate	Escherichia coli	ecoli_achtman_4	2705	ERR14660876	GCA_965182015	CBCYIT010000001-CBCYIT010000093
M-Mo228-M.2	Madagascar	neolic	mum	Escherichia coli	ecoli_achtman_4	167	ERR14660878	GCA_965183535	CBDACJ010000001-CBDACJ010000140
M-Mo234-B	Madagascar	neolic	neonate	Escherichia coli	ecoli_achtman_4	10	ERR14660879	GCA_965181995	CBCYIS010000001-CBCYIS010000083
M-Mo234-M	Madagascar	neolic	mum	Escherichia coli	ecoli_achtman_4	10	ERR14660880	GCA_965182495	CBCYJY010000001-CBCYJY010000109
M-Mo235-B.1	Madagascar	neolic	neonate	Escherichia coli	ecoli_achtman_4	131	ERR14660881	GCA_965181985	CBCYJJ010000001-CBCYJJ010000130
M-Mo235-M.2	Madagascar	neolic	mum	Escherichia coli	ecoli_achtman_4	131	ERR14660884	GCA_965183375	CBDACM010000001-CBDACM010000131
C-K400-B	Cambodia	peecnic	neonate	Escherichia coli	ecoli_achtman_4	7160	ERR14660694	GCA_965178915	CBCXYM010000001-CBCXYM010000089
C-K400-M	Cambodia	peecnic	mum	Escherichia coli	ecoli_achtman_4	7160	ERR14660695	GCA_965179085	CBCXYR010000001-CBCXYR010000067
C-K385-B.1	Cambodia	peecnic	neonate	Escherichia fergusonii	ecoli_achtman_4	-	ERR14660680	GCA_965179035	CBCXWO010000001-CBCXWO010000079
M-M047-B	Madagascar	birdy2	neonate	Klebsiella michiganensis	koxytoca	82	ERR14660778	GCA_965181465	CBCYIF010000001-CBCYIF010000159
M-M109-B.2	Madagascar	birdy2	neonate	Klebsiella michiganensis	koxytoca	-	ERR14660806	GCA_965182795	CBCYNB010000001-CBCYNB010000075
M-M162-B	Madagascar	birdy2	neonate	Klebsiella michiganensis	koxytoca	82	ERR14660831	GCA_965183415	CBDADI010000001-CBDADI010000177
M-Mo078-B.3	Madagascar	neolic	neonate	Klebsiella michiganensis	koxytoca	210	ERR14660852	GCA_965182235	CBCYLK010000001-CBCYLK010000101
M-Mo078-B.4	Madagascar	neolic	neonate	Klebsiella michiganensis	koxytoca	210	ERR14660853	GCA_965179655	CBCYAL010000001-CBCYAL010000117
C-K367-M	Cambodia	peecnic	mum	Klebsiella pneumoniae	klebsiella	2473	ERR14660668	GCA_965178995	CBCXYT010000001-CBCXYT010000158
C-K381-B	Cambodia	peecnic	neonate	Klebsiella pneumoniae	klebsiella	36	ERR14660678	GCA_965179045	CBCXZG010000001-CBCXZG010000116
C-P290-B	Cambodia	peecnic	neonate	Klebsiella pneumoniae	klebsiella	42	ERR14660725	GCA_965179015	CBCXZN010000001-CBCXZN010000095
C-P327-B.1	Cambodia	peecnic	neonate	Klebsiella pneumoniae	klebsiella	413	ERR14660731	GCA_965180815	CBCYEI010000001-CBCYEI010000101
C-P338-M	Cambodia	peecnic	mum	Klebsiella pneumoniae	klebsiella	4231	ERR14660743	GCA_965182905	CBCYND010000001-CBCYND010000128
C-P352-M	Cambodia	peecnic	mum	Klebsiella pneumoniae	klebsiella	15	ERR14660753	GCA_965180395	CBCYDS010000001-CBCYDS010000174
M-A047-M	Madagascar	birdy2	mum	Klebsiella pneumoniae	klebsiella	340	ERR14660767	GCA_965181605	CBCYHY010000001-CBCYHY010000093
M-A221-B	Madagascar	birdy2	neonate	Klebsiella pneumoniae	klebsiella	-	ERR14660774	GCA_965181505	CBCYHS010000001-CBCYHS010000067
M-M100-M.2	Madagascar	birdy2	mum	Klebsiella pneumoniae	klebsiella	7211	ERR14660794	GCA_965181875	CBCYIM010000001-CBCYIM010000096
M-M104-B	Madagascar	birdy2	neonate	Klebsiella pneumoniae	klebsiella	14	ERR14660798	GCA_965181905	CBCYJE010000001-CBCYJE010000070
M-M104-M.2	Madagascar	birdy2	mum	Klebsiella pneumoniae	klebsiella	7211	ERR14660800	GCA_965181895	CBCYIN010000001-CBCYIN010000095
M-M109-M.2	Madagascar	birdy2	mum	Klebsiella pneumoniae	klebsiella	70	ERR14660808	GCA_965182785	CBCYMW010000001-CBCYMW010000050
M-M137-B	Madagascar	birdy2	neonate	Klebsiella pneumoniae	klebsiella	711	ERR14660817	GCA_965181095	CBCYGF010000001-CBCYGF010000059
M-M137-M.2	Madagascar	birdy2	mum	Klebsiella pneumoniae	klebsiella	15	ERR14660819	GCA_965183435	CBDACV010000001-CBDACV010000045
M-M146-B.2	Madagascar	birdy2	neonate	Klebsiella pneumoniae	klebsiella	37	ERR14660825	GCA_965181355	CBCYGX010000001-CBCYGX010000081
M-M146-B.3	Madagascar	birdy2	neonate	Klebsiella pneumoniae	klebsiella	37	ERR14660826	GCA_965183395	CBDACS010000001-CBDACS010000085
M-M146-B.4	Madagascar	birdy2	neonate	Klebsiella pneumoniae	klebsiella	37	ERR14660827	GCA_965181345	CBCYGW010000001-CBCYGW010000073
M-M146-B.5	Madagascar	birdy2	neonate	Klebsiella pneumoniae	klebsiella	37	ERR14660828	GCA_965183385	CBDACR010000001-CBDACR010000087
M-M162-M.2	Madagascar	birdy2	mum	Klebsiella pneumoniae	klebsiella	711	ERR14660833	GCA_965181155	CBCYGK010000001-CBCYGK010000063
M-M271-M.2	Madagascar	birdy2	mum	Klebsiella pneumoniae	klebsiella	39	ERR14660841	GCA_965180155	CBCYCL010000001-CBCYCL010000065
M-Mo073-B.1	Madagascar	neolic	neonate	Klebsiella pneumoniae	klebsiella	39	ERR14660845	GCA_965181655	CBCYHX010000001-CBCYHX010000098
M-Mo073-B.4	Madagascar	neolic	neonate	Klebsiella pneumoniae	klebsiella	39	ERR14660848	GCA_965181645	CBCYHV010000001-CBCYHV010000106
M-Mo078-M.2	Madagascar	neolic	mum	Klebsiella pneumoniae	klebsiella	460	ERR14660855	GCA_965182215	CBCYKN010000001-CBCYKN010000117
M-Mo088-B	Madagascar	neolic	neonate	Klebsiella pneumoniae	klebsiella	37	ERR14660856	GCA_965179625	CBCYAH010000001-CBCYAH010000085
M-Mo172-M.1	Madagascar	neolic	mum	Klebsiella pneumoniae	klebsiella	789	ERR14660862	GCA_965182285	CBCYKD010000001-CBCYKD010000091
M-Mo178-B.3	Madagascar	neolic	neonate	Klebsiella pneumoniae	klebsiella	39	ERR14660867	GCA_965182265	CBCYKE010000001-CBCYKE010000068
M-Mo178-B.4	Madagascar	neolic	neonate	Klebsiella pneumoniae	klebsiella	39	ERR14660868	GCA_965182195	CBCYKB010000001-CBCYKB010000078
M-Mo228-M.1	Madagascar	neolic	mum	Klebsiella pneumoniae	klebsiella	219	ERR14660877	GCA_965183555	CBDADF010000001-CBDADF010000084
M-Mo235-B.2	Madagascar	neolic	neonate	Klebsiella pneumoniae	klebsiella	2473	ERR14660882	GCA_965181565	CBCYHP010000001-CBCYHP010000217
C-K353-B.2	Cambodia	peecnic	neonate	Klebsiella quasipneumoniae subsp. similipneumoniae	klebsiella	1473	ERR14660653	GCA_965179485	CBCXYP010000001-CBCXYP010000107
C-K414-M.1	Cambodia	peecnic	mum	Klebsiella quasipneumoniae subsp. similipneumoniae	klebsiella	1424	ERR14660701	GCA_965179285	CBCXZE010000001-CBCXZE010000115
C-K414-M.2	Cambodia	peecnic	mum	Klebsiella quasipneumoniae subsp. similipneumoniae	klebsiella	1424	ERR14660702	GCA_965178965	CBCXZD010000001-CBCXZD010000125
C-K424-B	Cambodia	peecnic	neonate	Klebsiella quasipneumoniae subsp. similipneumoniae	klebsiella	138	ERR14660707	GCA_965179495	CBCXZH010000001-CBCXZH010000105
C-P338-B.2	Cambodia	peecnic	neonate	Klebsiella quasipneumoniae subsp. similipneumoniae	klebsiella	2352	ERR14660742	GCA_965180915	CBCYFH010000001-CBCYFH010000088
M-M071-B.1	Madagascar	birdy2	neonate	Klebsiella quasipneumoniae subsp. similipneumoniae	klebsiella	1605	ERR14660784	GCA_965182925	CBCYNG010000001-CBCYNG010000093
M-M071-B.2	Madagascar	birdy2	neonate	Klebsiella quasipneumoniae subsp. similipneumoniae	klebsiella	1605	ERR14660785	GCA_965182325	CBCYKZ010000001-CBCYKZ010000085
M-M071-M.1	Madagascar	birdy2	mum	Klebsiella quasipneumoniae subsp. similipneumoniae	klebsiella	1605	ERR14660786	GCA_965182315	CBCYKX010000001-CBCYKX010000084
M-Mo235-M.1	Madagascar	neolic	mum	Klebsiella quasipneumoniae subsp. quasipneumoniae	klebsiella	6911	ERR14660883	GCA_965181975	CBCYJL010000001-CBCYJL010000055
M-Mo172-M.3	Madagascar	neolic	mum	Klebsiella variicola subsp. variicola	klebsiella	919	ERR14660864	GCA_965182275	CBCYKU010000001-CBCYKU010000080
M-A203-M.1	Madagascar	birdy2	mum	Citrobacter freundii	cfreundii	924	ERR14660943	GCA_965182405	CBCYKO010000001-CBCYKO010000123
M-A064-M.2	Madagascar	birdy2	mum	Citrobacter freundii	cfreundii	924	ERR14660929	GCA_965182075	CBCYJR010000001-CBCYJR010000103
M-M300-M.2	Madagascar	birdy2	mum	Citrobacter freundii	cfreundii	924	ERR14661005	GCA_965183145	CBDABI010000001-CBDABI010000103
M-M251-M	Madagascar	birdy2	mum	Citrobacter freundii	cfreundii	-	ERR14660990	GCA_965181455	CBCYHK010000001-CBCYHK010000105
M-M044-M	Madagascar	birdy2	mum	Citrobacter portucalensis	cfreundii	151	ERR14660958	GCA_965180495	CBCYDL010000001-CBCYDL010000111
M-M221-M.3	Madagascar	birdy2	mum	Citrobacter portucalensis	cfreundii	1040	ERR14660981	GCA_965181745	CBCYIE010000001-CBCYIE010000146
M-A194-M	Madagascar	birdy2	mum	Enterobacter intestinihominis	ecloacae	68	ERR14660942	GCA_965180695	CBCYDQ010000001-CBCYDQ010000072
M-A064-M.1	Madagascar	birdy2	mum	Enterobacter intestinihominis	ecloacae	98	ERR14660928	GCA_965180225	CBCYAY010000001-CBCYAY010000042
M-M105-M.2	Madagascar	birdy2	mum	Enterobacter intestinihominis	ecloacae	148	ERR14660963	GCA_965181045	CBCYFC010000001-CBCYFC010000081
M-M280-M.1	Madagascar	birdy2	mum	Enterobacter intestinihominis	ecloacae	68	ERR14660994	GCA_965181435	CBCYGE010000001-CBCYGE010000081
M-M238-M.2	Madagascar	birdy2	mum	Enterobacter kobei	ecloacae	32	ERR14660987	GCA_965182525	CBCYLH010000001-CBCYLH010000090
M-M238-M.1	Madagascar	birdy2	mum	Enterobacter kobei	ecloacae	32	ERR14660986	GCA_965180845	CBCYEM010000001-CBCYEM010000089
C-P360-M	Cambodia	peecnic	mum	Escherichia coli	ecoli_achtman_4	155	ERR2538210	GCA_965183475	CBDACF010000001-CBDACF010000132
C-P310-M	Cambodia	peecnic	mum	Escherichia coli	ecoli_achtman_4	131	ERR2538197	GCA_965180095	CBCYBY010000001-CBCYBY010000184
M-A044-M.1	Madagascar	birdy2	mum	Escherichia coli	ecoli_achtman_4	410	ERR14660921	GCA_965180255	CBCYBX010000001-CBCYBX010000117
C-P325-M	Cambodia	peecnic	mum	Escherichia coli	ecoli_achtman_4	421	ERR2538201	GCA_965183515	CBDADD010000001-CBDADD010000226
M-A004-M	Madagascar	birdy2	mum	Escherichia coli	ecoli_achtman_4	1312	ERR14660917	GCA_965183345	CBDABN010000001-CBDABN010000141
M-Mo224-M	Madagascar	neolic	mum	Escherichia coli	ecoli_achtman_4	7331	ERR14661038	GCA_965179675	CBCXZQ010000001-CBCXZQ010000115
M-M142-M	Madagascar	birdy2	mum	Escherichia coli	ecoli_achtman_4	48	ERR14660969	GCA_965180515	CBCYCO010000001-CBCYCO010000205
C-P341-M	Cambodia	peecnic	mum	Escherichia coli	ecoli_achtman_4	226	ERR2538206	GCA_965183165	CBDABK010000001-CBDABK010000230
C-P297-M	Cambodia	peecnic	mum	Escherichia coli	ecoli_achtman_4	405	ERR2538194	GCA_965180105	CBCYCK010000001-CBCYCK010000227
M-M098-M	Madagascar	birdy2	mum	Escherichia coli	ecoli_achtman_4	542	ERR14660961	GCA_965181055	CBCYEV010000001-CBCYEV010000043
C-P320-M	Cambodia	peecnic	mum	Escherichia coli	ecoli_achtman_4	10	ERR2538199	GCA_965179815	CBCYAM010000001-CBCYAM010000139
C-K420-M	Cambodia	peecnic	mum	Escherichia coli	ecoli_achtman_4	515	ERR14660902	GCA_965181575	CBCYHH010000001-CBCYHH010000104
M-M206-M	Madagascar	birdy2	mum	Escherichia coli	ecoli_achtman_4	3897	ERR14660975	GCA_965182615	CBCYKJ010000001-CBCYKJ010000064
M-M301-M	Madagascar	birdy2	mum	Escherichia coli	ecoli_achtman_4	617	ERR14661006	GCA_965181845	CBCYID010000001-CBCYID010000122
C-P367-M	Cambodia	peecnic	mum	Escherichia coli	ecoli_achtman_4	10	ERR14660915	GCA_965180285	CBCYBR010000001-CBCYBR010000118
C-K399-M	Cambodia	peecnic	mum	Escherichia coli	ecoli_achtman_4	10	ERR14660896	GCA_965179985	CBCYBF010000001-CBCYBF010000115
M-Mo039-M	Madagascar	neolic	mum	Escherichia coli	ecoli_achtman_4	3580	ERR14661010	GCA_965181815	CBCYIB010000001-CBCYIB010000082
M-M148-M	Madagascar	birdy2	mum	Escherichia coli	ecoli_achtman_4	3580	ERR14660970	GCA_965182585	CBCYKL010000001-CBCYKL010000071
M-A057-M	Madagascar	birdy2	mum	Escherichia coli	ecoli_achtman_4	131	ERR14660925	GCA_965180235	CBCYBZ010000001-CBCYBZ010000083
C-K425-M	Cambodia	peecnic	mum	Escherichia coli	ecoli_achtman_4	2165	ERR14660903	GCA_965181205	CBCYFV010000001-CBCYFV010000082
C-K350-M	Cambodia	peecnic	mum	Escherichia coli	ecoli_achtman_4	5150	ERR14660886	GCA_965181955	CBCYJB010000001-CBCYJB010000133
C-K383-M	Cambodia	peecnic	mum	Escherichia coli	ecoli_achtman_4	127	ERR14660893	GCA_965183075	CBDABE010000001-CBDABE010000095
M-M167-M	Madagascar	birdy2	mum	Escherichia coli	ecoli_achtman_4	48	ERR14660972	GCA_965181165	CBCYFP010000001-CBCYFP010000208
M-M127-M	Madagascar	birdy2	mum	Escherichia coli	ecoli_achtman_4	12821	ERR14660968	GCA_965181025	CBCYFF010000001-CBCYFF010000075
C-P304-M	Cambodia	peecnic	mum	Escherichia coli	ecoli_achtman_4	1722	ERR2538196	GCA_965179805	CBCYAP010000001-CBCYAP010000102
C-K377-M	Cambodia	peecnic	mum	Escherichia coli	ecoli_achtman_4	648	ERR14660890	GCA_965183095	CBDABF010000001-CBDABF010000113
M-A016-M	Madagascar	birdy2	mum	Escherichia coli	ecoli_achtman_4	10	ERR14660918	GCA_965180265	CBCYBH010000001-CBCYBH010000083
M-M242-M	Madagascar	birdy2	mum	Escherichia coli	ecoli_achtman_4	617	ERR14660988	GCA_965182515	CBCYKF010000001-CBCYKF010000107
C-P284-M	Cambodia	peecnic	mum	Escherichia coli	ecoli_achtman_4	43	ERR14660910	GCA_965180115	CBCYBM010000001-CBCYBM010000113
M-A044-M.4	Madagascar	birdy2	mum	Escherichia coli	ecoli_achtman_4	10	ERR14660924	GCA_965180245	CBCYCQ010000001-CBCYCQ010000260
C-K408-M	Cambodia	peecnic	mum	Escherichia coli	ecoli_achtman_4	38	ERR14660899	GCA_965181585	CBCYHN010000001-CBCYHN010000115
M-Mo191-M	Madagascar	neolic	mum	Escherichia coli	ecoli_achtman_4	1727	ERR14661033	GCA_965183655	CBDACX010000001-CBDACX010000058
M-M126-M	Madagascar	birdy2	mum	Escherichia coli	ecoli_achtman_4	12821	ERR14660967	GCA_965180505	CBCYCY010000001-CBCYCY010000077
M-Mo032-M	Madagascar	neolic	mum	Escherichia coli	ecoli_achtman_4	2521	ERR14661009	GCA_965181825	CBCYIC010000001-CBCYIC010000081
M-Mo158-M	Madagascar	neolic	mum	Escherichia coli	ecoli_achtman_4	-	ERR14661027	GCA_965183705	CBDADH010000001-CBDADH010000111
M-Mo170-M	Madagascar	neolic	mum	Escherichia coli	ecoli_achtman_4	716	ERR14661031	GCA_965179955	CBCYAW010000001-CBCYAW010000151
M-Mo090-M	Madagascar	neolic	mum	Escherichia coli	ecoli_achtman_4	2690	ERR14661018	GCA_965181915	CBCYIO010000001-CBCYIO010000093
C-K386-M	Cambodia	peecnic	mum	Escherichia coli	ecoli_achtman_4	-	ERR14660894	GCA_965179995	CBCYBQ010000001-CBCYBQ010000166
C-P340-M	Cambodia	peecnic	mum	Escherichia coli	ecoli_achtman_4	206	ERR14660912	GCA_965183505	CBDADA010000001-CBDADA010000184
C-K444-M	Cambodia	peecnic	mum	Escherichia coli	ecoli_achtman_4	1722	ERR14660909	GCA_965179785	CBCYAE010000001-CBCYAE010000099
C-K437-M	Cambodia	peecnic	mum	Escherichia coli	ecoli_achtman_4	10	ERR14661168	GCA_965179715	CBCYAF010000001-CBCYAF010000149
M-Mo044-M	Madagascar	neolic	mum	Escherichia coli	ecoli_achtman_4	131	ERR14661011	GCA_965182685	CBCYLW010000001-CBCYLW010000165
C-K368-M	Cambodia	peecnic	mum	Escherichia coli	ecoli_achtman_4	46	ERR14660887	GCA_965183105	CBCZXW010000001-CBCZXW010000141
C-K413-M	Cambodia	peecnic	mum	Escherichia coli	ecoli_achtman_4	10651	ERR14660901	GCA_965181215	CBCYFM010000001-CBCYFM010000071
M-M155-M	Madagascar	birdy2	mum	Escherichia coli	ecoli_achtman_4	10	ERR14660971	GCA_965181175	CBCYGB010000001-CBCYGB010000131
M-Mo102-M	Madagascar	neolic	mum	Escherichia coli	ecoli_achtman_4	2690	ERR14661019	GCA_965182645	CBCYKR010000001-CBCYKR010000110
M-M040-M	Madagascar	birdy2	mum	Escherichia coli	ecoli_achtman_4	1312	ERR14660957	GCA_965182695	CBCYKV010000001-CBCYKV010000164
M-M287-M	Madagascar	birdy2	mum	Escherichia coli	ecoli_achtman_4	48	ERR14661001	GCA_965183025	CBCZWL010000001-CBCZWL010000119
M-A249-M	Madagascar	birdy2	mum	Escherichia coli	ecoli_achtman_4	131	ERR14660948	GCA_965182755	CBCYMD010000001-CBCYMD010000109
C-K378-M	Cambodia	peecnic	mum	Escherichia coli	ecoli_achtman_4	226	ERR14660891	GCA_965180005	CBCYBB010000001-CBCYBB010000153
M-Mo159-M	Madagascar	neolic	mum	Escherichia coli	ecoli_achtman_4	405	ERR14661028	GCA_965183695	CBDADE010000001-CBDADE010000150
M-M214-M	Madagascar	birdy2	mum	Escherichia coli	ecoli_achtman_4	46	ERR14660978	GCA_965181795	CBCYHL010000001-CBCYHL010000095
C-K398-M	Cambodia	peecnic	mum	Escherichia coli	ecoli_achtman_4	1408	ERR14660895	GCA_965183065	CBCZUQ010000001-CBCZUQ010000101
C-K403-M	Cambodia	peecnic	mum	Escherichia coli	ecoli_achtman_4	540	ERR14660898	GCA_965179965	CBCYAS010000001-CBCYAS010000121
C-P333-M	Cambodia	peecnic	mum	Escherichia coli	ecoli_achtman_4	361	ERR2538203	GCA_965183175	CBDAAX010000001-CBDAAX010000137
M-Mo223-M.2	Madagascar	neolic	mum	Escherichia coli	ecoli_achtman_4	8-7-1-8-8-378-2	ERR14661037	GCA_965180925	CBCYEP010000001-CBCYEP010000112
M-Mo113-M	Madagascar	neolic	mum	Escherichia coli	ecoli_achtman_4	13815	ERR14661022	GCA_965181385	CBCYFR010000001-CBCYFR010000075
M-Mo184-M	Madagascar	neolic	mum	Escherichia coli	ecoli_achtman_4	484	ERR14661032	GCA_965183675	CBDADC010000001-CBDADC010000116
M-Mo046-M	Madagascar	neolic	mum	Escherichia coli	ecoli_achtman_4	15400	ERR14661012	GCA_965181805	CBCYHO010000001-CBCYHO010000119
M-M211-M	Madagascar	birdy2	mum	Escherichia coli	ecoli_achtman_4	4684	ERR14660976	GCA_965180985	CBCYEU010000001-CBCYEU010000053
M-M300-M.1	Madagascar	birdy2	mum	Escherichia coli	ecoli_achtman_4	2690	ERR14661004	GCA_965180975	CBCYEQ010000001-CBCYEQ010000111
M-A179-M.1	Madagascar	birdy2	mum	Escherichia coli	ecoli_achtman_4	746	ERR14660936	GCA_965180905	CBCYEO010000001-CBCYEO010000129
M-M037-M.2	Madagascar	birdy2	mum	Escherichia coli	ecoli_achtman_4	2690	ERR14660955	GCA_965181085	CBCYFW010000001-CBCYFW010000139
M-M295-M	Madagascar	birdy2	mum	Escherichia coli	ecoli_achtman_4	716	ERR14661002	GCA_965180865	CBCYEN010000001-CBCYEN010000158
M-Mo143-M	Madagascar	neolic	mum	Escherichia coli	ecoli_achtman_4	58	ERR14661024	GCA_965183725	CBDADG010000001-CBDADG010000186
M-M265-M.1	Madagascar	birdy2	mum	Escherichia coli	ecoli_achtman_4	453	ERR14660992	GCA_965181445	CBCYGP010000001-CBCYGP010000120
M-Mo059-M.2	Madagascar	neolic	mum	Escherichia coli	ecoli_achtman_4	46	ERR14661015	GCA_965182655	CBCYLC010000001-CBCYLC010000117
C-K347-M	Cambodia	peecnic	mum	Escherichia coli	ecoli_achtman_4	757	ERR14660885	GCA_965181965	CBCYIW010000001-CBCYIW010000214
M-M304-M	Madagascar	birdy2	mum	Escherichia coli	ecoli_achtman_4	131	ERR14661007	GCA_965181835	CBCYIK010000001-CBCYIK010000150
M-M171-M	Madagascar	birdy2	mum	Escherichia coli	ecoli_achtman_4	131	ERR14660973	GCA_965182575	CBCYLF010000001-CBCYLF010000145
M-Mo153-M	Madagascar	neolic	mum	Escherichia coli	ecoli_achtman_4	1638	ERR14661025	GCA_965183715	CBDACQ010000001-CBDACQ010000138
M-A026-M	Madagascar	birdy2	mum	Escherichia coli	ecoli_achtman_4	12138	ERR14660919	GCA_965183325	CBDABR010000001-CBDABR010000157
M-A203-M.2	Madagascar	birdy2	mum	Escherichia coli	ecoli_achtman_4	3268	ERR14660944	GCA_965180685	CBCYDW010000001-CBCYDW010000093
M-Mo115-M	Madagascar	neolic	mum	Escherichia coli	ecoli_achtman_4	12821	ERR14661023	GCA_965183125	CBDABC010000001-CBDABC010000117
M-Mo057-M	Madagascar	neolic	mum	Escherichia coli	ecoli_achtman_4	48	ERR14661013	GCA_965182665	CBCYLL010000001-CBCYLL010000201
M-A142-M	Madagascar	birdy2	mum	Escherichia coli	ecoli_achtman_4	58	ERR14660932	GCA_965180755	CBCYEB010000001-CBCYEB010000092
M-A231-M	Madagascar	birdy2	mum	Escherichia coli	ecoli_achtman_4	1072	ERR14660947	GCA_965182385	CBCYKA010000001-CBCYKA010000193
M-M283-M.1	Madagascar	birdy2	mum	Escherichia coli	ecoli_achtman_4	38	ERR14660997	GCA_965180335	CBCYCC010000001-CBCYCC010000104
M-A182-M.3	Madagascar	birdy2	mum	Escherichia coli	ecoli_achtman_4	1312	ERR14660941	GCA_965180705	CBCYDH010000001-CBCYDH010000144
M-Mo221-M.2	Madagascar	neolic	mum	Escherichia coli	ecoli_achtman_4	4	ERR14661035	GCA_965180935	CBCYER010000001-CBCYER010000099
M-M280-M.2	Madagascar	birdy2	mum	Escherichia coli	ecoli_achtman_4	7152	ERR14660995	GCA_965181335	CBCYFU010000001-CBCYFU010000147
M-M032-M	Madagascar	birdy2	mum	Escherichia coli	ecoli_achtman_4	2521	ERR14660953	GCA_965181075	CBCYEZ010000001-CBCYEZ010000082
M-M224-M	Madagascar	birdy2	mum	Escherichia coli	ecoli_achtman_4	540	ERR14660983	GCA_965181735	CBCYHI010000001-CBCYHI010000118
M-Mo105-M	Madagascar	neolic	mum	Escherichia coli	ecoli_achtman_4	58	ERR14661020	GCA_965181395	CBCYGT010000001-CBCYGT010000184
M-M059-M.2	Madagascar	birdy2	mum	Escherichia coli	ecoli_achtman_4	12821	ERR14660960	GCA_965180485	CBCYCM010000001-CBCYCM010000107
M-A089-M.1	Madagascar	birdy2	mum	Escherichia coli	ecoli_achtman_4	206	ERR14660930	GCA_965182105	CBCYJC010000001-CBCYJC010000140
M-M285-M.1	Madagascar	birdy2	mum	Escherichia coli	ecoli_achtman_4	617	ERR14660999	GCA_965181725	CBCYGY010000001-CBCYGY010000129
M-A059-M	Madagascar	birdy2	mum	Escherichia coli	ecoli_achtman_4	10	ERR14660927	GCA_965183285	CBDABJ010000001-CBDABJ010000142
C-P296-M	Cambodia	peecnic	mum	Escherichia coli	ecoli_achtman_4	617	ERR2538193	GCA_965179775	CBCXZT010000001-CBCXZT010000301
M-Mo111-M	Madagascar	neolic	mum	Escherichia coli	ecoli_achtman_4	12815	ERR14661021	GCA_965182635	CBCYLD010000001-CBCYLD010000080
C-K376-M	Cambodia	peecnic	mum	Escherichia coli	ecoli_achtman_4	131	ERR14660889	GCA_965180015	CBCYBV010000001-CBCYBV010000133
M-A147-M	Madagascar	birdy2	mum	Escherichia coli	ecoli_achtman_4	1193	ERR14660933	GCA_965182415	CBCYKG010000001-CBCYKG010000097
M-A160-M	Madagascar	birdy2	mum	Escherichia coli	ecoli_achtman_4	46	ERR14660934	GCA_965180745	CBCYDP010000001-CBCYDP010000147
M-A250-M	Madagascar	birdy2	mum	Escherichia coli	ecoli_achtman_4	746	ERR14660949	GCA_965182735	CBCYLJ010000001-CBCYLJ010000115
M-M285-M.2	Madagascar	birdy2	mum	Escherichia coli	ecoli_achtman_4	648	ERR14661000	GCA_965182995	CBDABD010000001-CBDABD010000101
C-K438-M	Cambodia	peecnic	mum	Escherichia coli	ecoli_achtman_4	11543	ERR14660907	GCA_965179685	CBCYAG010000001-CBCYAG010000245
M-M008-M	Madagascar	birdy2	mum	Escherichia coli	ecoli_achtman_4	656	ERR14660950	GCA_965181855	CBCYIG010000001-CBCYIG010000200
M-M212-M	Madagascar	birdy2	mum	Escherichia coli	ecoli_achtman_4	10	ERR14660977	GCA_965182605	CBCYLI010000001-CBCYLI010000178
M-A182-M.1	Madagascar	birdy2	mum	Escherichia coli	ecoli_achtman_4	12780	ERR14660939	GCA_965180715	CBCYDR010000001-CBCYDR010000155
M-M254-M	Madagascar	birdy2	mum	Escherichia coli	ecoli_achtman_4	542	ERR14660991	GCA_965183265	CBDABG010000001-CBDABG010000079
M-A227-M	Madagascar	birdy2	mum	Escherichia coli	ecoli_achtman_4	69	ERR14660945	GCA_965182395	CBCYKY010000001-CBCYKY010000249
M-M021-M	Madagascar	birdy2	mum	Escherichia coli	ecoli_achtman_4	38	ERR14660952	GCA_965182715	CBCYMA010000001-CBCYMA010000219
M-M011-M	Madagascar	birdy2	mum	Escherichia coli	ecoli_achtman_4	2690	ERR14660951	GCA_965182725	CBCYLM010000001-CBCYLM010000144
C-K382-M	Cambodia	peecnic	mum	Escherichia coli	ecoli_achtman_4	2690	ERR14660892	GCA_965183085	CBDABA010000001-CBDABA010000144
M-M280-M.3	Madagascar	birdy2	mum	Escherichia coli	ecoli_achtman_4	38	ERR14660996	GCA_965181325	CBCYHF010000001-CBCYHF010000276
M-Mo164-M.2	Madagascar	neolic	mum	Escherichia coli	ecoli_achtman_4	155	ERR14661030	GCA_965183685	CBDACW010000001-CBDACW010000090
C-K410-M	Cambodia	peecnic	mum	Escherichia coli	ecoli_achtman_4	10	ERR14660900	GCA_965181405	CBCYFY010000001-CBCYFY010000114
C-K369-M	Cambodia	peecnic	mum	Escherichia coli	ecoli_achtman_4	410	ERR14660888	GCA_965180025	CBCYBI010000001-CBCYBI010000138
M-Mo157-M	Madagascar	neolic	mum	Escherichia coli	ecoli_achtman_4	5909	ERR14661026	GCA_965183155	CBDAAZ010000001-CBDAAZ010000110
C-P365-M.1	Cambodia	peecnic	mum	Escherichia coli	ecoli_achtman_4	38	ERR2538211	GCA_965183195	CBDABL010000001-CBDABL010000378
C-P322-M.1	Cambodia	peecnic	mum	Escherichia coli	ecoli_achtman_4	215	ERR2538200	GCA_965183525	CBDACA010000001-CBDACA010000138
C-K435-M	Cambodia	peecnic	mum	Escherichia coli	ecoli_achtman_4	206	ERR14660906	GCA_965180135	CBCYBG010000001-CBCYBG010000111
M-Mo031-M	Madagascar	neolic	mum	Escherichia coli	ecoli_achtman_4	46	ERR14661008	GCA_965179875	CBCYAT010000001-CBCYAT010000143
M-A169-M	Madagascar	birdy2	mum	Escherichia coli	ecoli_achtman_4	450	ERR14660935	GCA_965180735	CBCYED010000001-CBCYED010000268
M-A058-M	Madagascar	birdy2	mum	Klebsiella pneumoniae	klebsiella	29	ERR14660926	GCA_965183295	CBDACL010000001-CBDACL010000070
M-M121-M	Madagascar	birdy2	mum	Klebsiella pneumoniae	klebsiella	985	ERR14660966	GCA_965181035	CBCYGJ010000001-CBCYGJ010000034
M-M225-M	Madagascar	birdy2	mum	Klebsiella pneumoniae	klebsiella	307	ERR14660985	GCA_965182545	CBCYLO010000001-CBCYLO010000046
M-Mo059-M.3	Madagascar	neolic	mum	Klebsiella pneumoniae	klebsiella	234	ERR14661017	GCA_965181925	CBCYJH010000001-CBCYJH010000081
M-M283-M.2	Madagascar	birdy2	mum	Klebsiella pneumoniae	klebsiella	711	ERR14660998	GCA_965181005	CBCYFS010000001-CBCYFS010000054
M-A179-M.2	Madagascar	birdy2	mum	Klebsiella pneumoniae	klebsiella	39	ERR14660937	GCA_965180725	CBCYEH010000001-CBCYEH010000093
M-M221-M.1	Madagascar	birdy2	mum	Klebsiella pneumoniae	klebsiella	985	ERR14660979	GCA_965182005	CBCYJP010000001-CBCYJP010000051
M-M037-M.1	Madagascar	birdy2	mum	Klebsiella pneumoniae	klebsiella	327	ERR14660954	GCA_965182705	CBCYMZ010000001-CBCYMZ010000116
M-M184-M	Madagascar	birdy2	mum	Klebsiella pneumoniae	klebsiella	7211	ERR14660974	GCA_965180995	CBCYFZ010000001-CBCYFZ010000082
M-Mo164-M.1	Madagascar	neolic	mum	Klebsiella pneumoniae	klebsiella	967	ERR14661029	GCA_965179975	CBCYCB010000001-CBCYCB010000070
M-M265-M.2	Madagascar	birdy2	mum	Klebsiella pneumoniae	klebsiella	14	ERR14660993	GCA_965183255	CBDACP010000001-CBDACP010000089
M-M105-M.1	Madagascar	birdy2	mum	Klebsiella pneumoniae	klebsiella	70	ERR14660962	GCA_965180545	CBCYDT010000001-CBCYDT010000081
M-M107-M	Madagascar	birdy2	mum	Klebsiella pneumoniae	klebsiella	4083	ERR14660964	GCA_965180535	CBCYDG010000001-CBCYDG010000043
M-M223-M	Madagascar	birdy2	mum	Klebsiella pneumoniae	klebsiella	29	ERR14660982	GCA_965182535	CBCYLS010000001-CBCYLS010000047
M-Mo223-M.1	Madagascar	neolic	mum	Klebsiella pneumoniae	klebsiella	4240	ERR14661036	GCA_965179595	CBCYAJ010000001-CBCYAJ010000049
M-Mo059-M.1	Madagascar	neolic	mum	Klebsiella pneumoniae	klebsiella	234	ERR14661014	GCA_965181785	CBCYIJ010000001-CBCYIJ010000079
M-M059-M.1	Madagascar	birdy2	mum	Klebsiella pneumoniae	klebsiella	39	ERR14660959	GCA_965181065	CBCYGG010000001-CBCYGG010000076
C-K402-M	Cambodia	peecnic	mum	Klebsiella pneumoniae	klebsiella	2877	ERR14660897	GCA_965181615	CBCYHT010000001-CBCYHT010000081
M-M250-M	Madagascar	birdy2	mum	Klebsiella pneumoniae	klebsiella	36	ERR14660989	GCA_965180835	CBCYEL010000001-CBCYEL010000092
M-A089-M.2	Madagascar	birdy2	mum	Klebsiella pneumoniae	klebsiella	1741	ERR14660931	GCA_965180215	CBCYCU010000001-CBCYCU010000058
M-M297-M	Madagascar	birdy2	mum	Klebsiella pneumoniae	klebsiella	45	ERR14661003	GCA_965183185	CBDACC010000001-CBDACC010000063
M-M221-M.2	Madagascar	birdy2	mum	Klebsiella pneumoniae	klebsiella	449	ERR14660980	GCA_965182555	CBCYLR010000001-CBCYLR010000063
M-Mo221-M.1	Madagascar	neolic	mum	Klebsiella pneumoniae	klebsiella	1119	ERR14661034	GCA_965180675	CBCYEE010000001-CBCYEE010000173
M-A182-M.2	Madagascar	birdy2	mum	Klebsiella quasipneumoniae subsp. similipneumoniae	klebsiella	18-22-18-126-11-13-51	ERR14660940	GCA_965182335	CBCYKT010000001-CBCYKT010000105
C-K432-M	Cambodia	peecnic	mum	Klebsiella quasipneumoniae subsp. similipneumoniae	klebsiella	334	ERR14660905	GCA_965180145	CBCYCZ010000001-CBCYCZ010000093
C-P357-M	Cambodia	peecnic	mum	Klebsiella quasipneumoniae subsp. similipneumoniae	klebsiella	414	ERR14660913	GCA_965183215	CBDABY010000001-CBDABY010000065
M-A228-M	Madagascar	birdy2	mum	Klebsiella quasipneumoniae subsp. quasipneumoniae	klebsiella	2604	ERR14660946	GCA_965183205	CBDABP010000001-CBDABP010000118
M-A044-M.3	Madagascar	birdy2	mum	Klebsiella quasipneumoniae subsp. similipneumoniae	klebsiella	1548	ERR14660923	GCA_965180275	CBCYDB010000001-CBCYDB010000091
M-A180-M	Madagascar	birdy2	mum	Klebsiella variicola subsp. variicola	klebsiella	919	ERR14660938	GCA_965180885	CBCYFJ010000001-CBCYFJ010000087
M-A014-B	Madagascar	birdy2	neonate	Klebsiella pneumoniae	klebsiella	1109	ERR14661057	GCA_965179645	CBCYAI010000001-CBCYAI010000054
M-M196-B	Madagascar	birdy2	neonate	Escherichia coli	ecoli_achtman_4	405	ERR14661110	GCA_965181665	CBCYHQ010000001-CBCYHQ010000133
M-M173-B	Madagascar	birdy2	neonate	Enterobacter kobei	ecloacae	32	ERR14661104	GCA_965181695	CBCYHU010000001-CBCYHU010000100
M-M135-B	Madagascar	birdy2	neonate	Escherichia coli	ecoli_achtman_4	2301	ERR14661094	GCA_965183225	CBDABO010000001-CBDABO010000107
M-M260-B	Madagascar	birdy2	neonate	Enterobacter intestinihominis	ecloacae	118	ERR14661114	GCA_965182845	CBCYMP010000001-CBCYMP010000059
M-A040-B	Madagascar	birdy2	neonate	Klebsiella pneumoniae	klebsiella	307	ERR14661058	GCA_965179585	CBCYAK010000001-CBCYAK010000052
M-M063-B	Madagascar	birdy2	neonate	Escherichia coli	ecoli_achtman_4	200	ERR14661079	GCA_965180205	CBCYCW010000001-CBCYCW010000186
M-A049-B.1	Madagascar	birdy2	neonate	Escherichia coli	ecoli_achtman_4	1312	ERR14661060	GCA_965181945	CBCYIP010000001-CBCYIP010000144
M-A049-B.2	Madagascar	birdy2	neonate	Klebsiella pneumoniae	klebsiella	243	ERR14661061	GCA_965180565	CBCYDK010000001-CBCYDK010000077
M-M115-B	Madagascar	birdy2	neonate	Klebsiella pneumoniae	klebsiella	29	ERR14661091	GCA_965182095	CBCYJZ010000001-CBCYJZ010000065
M-A102-B	Madagascar	birdy2	neonate	Klebsiella pneumoniae	klebsiella	307	ERR14661064	GCA_965182175	CBCYKH010000001-CBCYKH010000054
M-M079-B	Madagascar	birdy2	neonate	Enterobacter intestinihominis	ecloacae	1712	ERR14661082	GCA_965180185	CBCYCE010000001-CBCYCE010000058
M-M145-B.1	Madagascar	birdy2	neonate	Enterobacter kobei	ecloacae	32	ERR14661101	GCA_965181715	CBCYHW010000001-CBCYHW010000093
M-M145-B.2	Madagascar	birdy2	neonate	Escherichia coli	ecoli_achtman_4	453	ERR14661102	GCA_965181705	CBCYHA010000001-CBCYHA010000070
M-M195-B	Madagascar	birdy2	neonate	Klebsiella michiganensis	koxytoca	177	ERR14661109	GCA_965182255	CBCYMV010000001-CBCYMV010000167
M-M143-B.1	Madagascar	birdy2	neonate	Klebsiella pneumoniae	klebsiella	17	ERR14661098	GCA_965180175	CBCYCN010000001-CBCYCN010000074
M-M068-B.2	Madagascar	birdy2	neonate	Escherichia coli	ecoli_achtman_4	7013	ERR14661081	GCA_965182975	CBCZNN010000001-CBCZNN010000142
M-M136-B	Madagascar	birdy2	neonate	Escherichia coli	ecoli_achtman_4	648	ERR14661095	GCA_965183245	CBDABX010000001-CBDABX010000171
M-M089-B.1	Madagascar	birdy2	neonate	Citrobacter freundii	cfreundii	95	ERR14661085	GCA_965182505	CBCYLB010000001-CBCYLB010000130
M-M043-B	Madagascar	birdy2	neonate	Citrobacter freundii	cfreundii	116	ERR14661078	GCA_965182985	CBDAAW010000001-CBDAAW010000099
M-M226-B	Madagascar	birdy2	neonate	Klebsiella pneumoniae	klebsiella	8	ERR14661111	GCA_965182245	CBCYKK010000001-CBCYKK010000055
M-A106-B	Madagascar	birdy2	neonate	Klebsiella pneumoniae	klebsiella	313	ERR14661170	GCA_965183035	CBDABH010000001-CBDABH010000099
M-M299-B	Madagascar	birdy2	neonate	Enterobacter roggenkampii	ecloacae	2945	ERR14661117	GCA_965180075	CBCYBC010000001-CBCYBC010000144
M-A112-B	Madagascar	birdy2	neonate	Escherichia coli	ecoli_achtman_4	685	ERR14661065	GCA_965182155	CBCYIX010000001-CBCYIX010000124
M-A068-B	Madagascar	birdy2	neonate	Klebsiella pneumoniae	klebsiella	3224	ERR14661062	GCA_965180855	CBCYFK010000001-CBCYFK010000141
M-M085-B	Madagascar	birdy2	neonate	Escherichia coli	ecoli_achtman_4	450	ERR14661083	GCA_965180955	CBCYEX010000001-CBCYEX010000205
M-M140-B	Madagascar	birdy2	neonate	Escherichia coli	ecoli_achtman_4	656	ERR14661097	GCA_965183275	CBDABV010000001-CBDABV010000199
M-M243-B	Madagascar	birdy2	neonate	Enterobacter kobei	ecloacae	32	ERR14661112	GCA_965182825	CBCYMY010000001-CBCYMY010000093
M-M129-B	Madagascar	birdy2	neonate	Klebsiella pneumoniae	klebsiella	-	ERR14661092	GCA_965183235	CBDACG010000001-CBDACG010000102
M-M091-B.1	Madagascar	birdy2	neonate	Enterobacter intestinihominis	ecloacae	2895	ERR14661088	GCA_965181775	CBCYHR010000001-CBCYHR010000058
M-A171-B	Madagascar	birdy2	neonate	Klebsiella pneumoniae	klebsiella	17	ERR14661068	GCA_965182935	CBCYOX010000001-CBCYOX010000094
M-M143-B.2	Madagascar	birdy2	neonate	Enterobacter kobei	ecloacae	32	ERR14661099	GCA_965181935	CBCYJA010000001-CBCYJA010000122
M-M096-B	Madagascar	birdy2	neonate	Citrobacter cronae	cfreundii	-	ERR14661090	GCA_965181765	CBCYHZ010000001-CBCYHZ010000110
M-M175-B	Madagascar	birdy2	neonate	Klebsiella michiganensis	koxytoca	82	ERR14661105	GCA_965183615	CBDADJ010000001-CBDADJ010000162
M-M143-B.3	Madagascar	birdy2	neonate	Enterobacter asburiae	ecloacae	-	ERR14661100	GCA_965183635	CBDACT010000001-CBDACT010000061
M-A046-B	Madagascar	birdy2	neonate	Escherichia coli	ecoli_achtman_4	602	ERR14661059	GCA_965179865	CBCYBA010000001-CBCYBA010000077
M-M087-B	Madagascar	birdy2	neonate	Enterobacter kobei	ecloacae	32	ERR14661084	GCA_965182485	CBCYLA010000001-CBCYLA010000093
M-M041-B	Madagascar	birdy2	neonate	Escherichia coli	ecoli_achtman_4	6280	ERR14661076	GCA_965180655	CBCYEA010000001-CBCYEA010000220
M-M158-B	Madagascar	birdy2	neonate	Escherichia coli	ecoli_achtman_4	3489	ERR14661103	GCA_965183625	CBDACE010000001-CBDACE010000145
M-A093-B	Madagascar	birdy2	neonate	Escherichia coli	ecoli_achtman_4	58	ERR14661063	GCA_965183045	CBCZWA010000001-CBCZWA010000143
M-A193-B	Madagascar	birdy2	neonate	Enterobacter intestinihominis	ecloacae	50	ERR14661071	GCA_965182955	CBCZNO010000001-CBCZNO010000064
M-M194-B	Madagascar	birdy2	neonate	Enterobacter intestinihominis	ecloacae	2895	ERR14661108	GCA_965181675	CBCYHG010000001-CBCYHG010000050
M-A190-B.1	Madagascar	birdy2	neonate	Klebsiella pneumoniae	klebsiella	39	ERR14661069	GCA_965182945	CBCYWX010000001-CBCYWX010000078
M-A190-B.2	Madagascar	birdy2	neonate	Klebsiella pneumoniae	klebsiella	39	ERR14661070	GCA_965179945	CBCYBU010000001-CBCYBU010000079
M-A206-B	Madagascar	birdy2	neonate	Enterobacter kobei	ecloacae	365	ERR14661072	GCA_965179935	CBCYBN010000001-CBCYBN010000068
C-P331-B	Cambodia	peecnic	neonate	Enterobacter intestinihominis	ecloacae	-	ERR14661051	GCA_965180895	CBCYET010000001-CBCYET010000079
M-Mo101-B.3	Madagascar	neolic	neonate	Enterobacter intestinihominis	ecloacae	50	ERR14661122	GCA_965180045	CBCYBO010000001-CBCYBO010000067
M-M091-B.2	Madagascar	birdy2	neonate	Citrobacter freundii	cfreundii	95	ERR14661089	GCA_965182805	CBCYMT010000001-CBCYMT010000105
M-M019-B	Madagascar	birdy2	neonate	Escherichia coli	ecoli_achtman_4	-	ERR14661075	GCA_965180665	CBCYDI010000001-CBCYDI010000065
M-M288-B	Madagascar	birdy2	neonate	Enterobacter intestinihominis	ecloacae	51	ERR14661116	GCA_965180315	CBCYBT010000001-CBCYBT010000045
C-K404-B.2	Cambodia	peecnic	neonate	Klebsiella quasipneumoniae subsp. similipneumoniae	klebsiella	1308	ERR14661041	GCA_965179615	CBCYAD010000001-CBCYAD010000081
C-K404-B.1	Cambodia	peecnic	neonate	Escherichia coli	ecoli_achtman_4	354	ERR14661040	GCA_965181365	CBCYGV010000001-CBCYGV010000099
C-K418-B	Cambodia	peecnic	neonate	Escherichia coli	ecoli_achtman_4	206	ERR14661043	GCA_965179635	CBCXZW010000001-CBCXZW010000135
C-K422-B	Cambodia	peecnic	neonate	Escherichia coli	ecoli_achtman_4	1193	ERR14661045	GCA_965182355	CBCYJX010000001-CBCYJX010000112
C-K417-B	Cambodia	peecnic	neonate	Enterobacter intestinihominis	ecloacae	-	ERR14661042	GCA_965182375	CBCYJS010000001-CBCYJS010000071
C-P271-B	Cambodia	peecnic	neonate	Escherichia coli	ecoli_achtman_4	6782	ERR14661046	GCA_965179745	CBCXZR010000001-CBCXZR010000146
C-P350-B	Cambodia	peecnic	neonate	Klebsiella pneumoniae	klebsiella	36	ERR14661052	GCA_965180085	CBCYCP010000001-CBCYCP010000133
C-P358-B.1	Cambodia	peecnic	neonate	Escherichia coli	ecoli_achtman_4	46	ERR14661053	GCA_965180875	CBCYES010000001-CBCYES010000163
C-P358-B.2	Cambodia	peecnic	neonate	Escherichia coli	ecoli_achtman_4	46	ERR14661054	GCA_965179605	CBCXZX010000001-CBCXZX010000171
C-K419-B	Cambodia	peecnic	neonate	Klebsiella pneumoniae	klebsiella	54	ERR14661044	GCA_965182365	CBCYLG010000001-CBCYLG010000163
C-P298-B.1	Cambodia	peecnic	neonate	Escherichia coli	ecoli_achtman_4	1674	ERR14661049	GCA_965182345	CBCYJU010000001-CBCYJU010000080
C-P298-B.2	Cambodia	peecnic	neonate	Escherichia coli	ecoli_achtman_4	-	ERR14661050	GCA_965182675	CBCYLQ010000001-CBCYLQ010000152
C-P370-B	Cambodia	peecnic	neonate	Enterobacter cloacae	ecloacae	84	ERR14661056	GCA_965179755	CBCYAB010000001-CBCYAB010000184
C-P293-B	Cambodia	peecnic	neonate	Klebsiella pneumoniae	klebsiella	307	ERR14661048	GCA_965179725	CBCYAC010000001-CBCYAC010000079
M-Mo150-B.1	Madagascar	neolic	neonate	Enterobacter intestinihominis	ecloacae	-	ERR14661150	GCA_965182965	CBCZNM010000001-CBCZNM010000064
M-Mo243-B	Madagascar	neolic	neonate	Klebsiella pneumoniae	klebsiella	17	ERR14661154	GCA_965182115	CBCYKC010000001-CBCYKC010000074
M-Mo150-B.2	Madagascar	neolic	neonate	Enterobacter intestinihominis	ecloacae	-	ERR14661151	GCA_965182625	CBCYKQ010000001-CBCYKQ010000067
M-Mo064-B.1	Madagascar	neolic	neonate	Enterobacter asburiae	ecloacae	-	ERR14661118	GCA_965180065	CBCYAU010000001-CBCYAU010000036
M-Mo121-B	Madagascar	neolic	neonate	Klebsiella michiganensis	koxytoca	-	ERR14661124	GCA_965180035	CBCYCT010000001-CBCYCT010000064
M-Mo120-B	Madagascar	neolic	neonate	Escherichia coli	ecoli_achtman_4	3489	ERR14661123	GCA_965179855	CBCYAV010000001-CBCYAV010000058
M-Mo101-B.1	Madagascar	neolic	neonate	Klebsiella michiganensis	koxytoca	-	ERR14661120	GCA_965179845	CBCYDJ010000001-CBCYDJ010000097
M-Mo101-B.2	Madagascar	neolic	neonate	Enterobacter intestinihominis	ecloacae	50	ERR14661121	GCA_965180055	CBCYBK010000001-CBCYBK010000065
M-Mo133-B	Madagascar	neolic	neonate	Klebsiella pneumoniae	klebsiella	17	ERR14661149	GCA_965180555	CBCYDV010000001-CBCYDV010000069
M-Mo064-B.2	Madagascar	neolic	neonate	Escherichia coli	ecoli_achtman_4	155	ERR14661119	GCA_965179835	CBCYAO010000001-CBCYAO010000076
C-K367-B	Cambodia	peecnic	neonate	Citrobacter sedlakii	cfreundii	696	ERR14660667	GCA_965179135	CBCXXY010000001-CBCXXY010000065
C-K372-B.1	Cambodia	peecnic	neonate	Enterobacter intestinihominis	ecloacae	1013	ERR14660669	GCA_965179145	CBCXYK010000001-CBCXYK010000094
C-K374-B	Cambodia	peecnic	neonate	Enterobacter cloacae	ecloacae	-	ERR14660674	GCA_965179355	CBCXXU010000001-CBCXXU010000035
C-K427-M	Cambodia	peecnic	mum	Escherichia coli	ecoli_achtman_4	38	ERR14660904	GCA_965182565	CBCYKW010000001-CBCYKW010000091
C-K442-M	Cambodia	peecnic	mum	Escherichia coli	ecoli_achtman_4	58	ERR14660908	GCA_965180125	CBCYBE010000001-CBCYBE010000068
C-K445-B.1	Cambodia	peecnic	neonate	Escherichia coli	ecoli_achtman_4	38	ERR14660719	GCA_965179245	CBCXZM010000001-CBCXZM010000131
C-P311-B	Cambodia	peecnic	neonate	Escherichia coli	ecoli_achtman_4	8375	ERR14660727	GCA_965178895	CBCXZO010000001-CBCXZO010000116
C-P322-M.2	Cambodia	peecnic	mum	Escherichia coli	ecoli_achtman_4	101	ERR14660911	GCA_965179825	CBCYAZ010000001-CBCYAZ010000124
C-P328-B	Cambodia	peecnic	neonate	Escherichia coli	ecoli_achtman_4	93	ERR14660733	GCA_965180795	CBCYEJ010000001-CBCYEJ010000165
C-P332-M	Cambodia	peecnic	mum	Escherichia coli	ecoli_achtman_4	450	ERR14660737	GCA_965180765	CBCYEF010000001-CBCYEF010000182
C-P358-B.3	Cambodia	peecnic	neonate	Escherichia coli	ecoli_achtman_4	46	ERR14661055	GCA_965180965	CBCYFB010000001-CBCYFB010000151
C-P361-M	Cambodia	peecnic	mum	Escherichia coli	ecoli_achtman_4	-	ERR14660756	GCA_965180375	CBCYDD010000001-CBCYDD010000114
C-P365-M.2	Cambodia	peecnic	mum	Escherichia coli	ecoli_achtman_4	10	ERR14660914	GCA_965183355	CBDABM010000001-CBDABM010000117
M-M101-B	Madagascar	birdy2	neonate	Atlantibacter hermannii	-	-	ERR14660795	GCA_965182305	CBCYJM010000001-CBCYJM010000052
C-P338-B.1	Cambodia	peecnic	neonate	Enterobacter intestinihominis	ecloacae	923	ERR14660741	GCA_965182915	CBCYMU010000001-CBCYMU010000036
C-K429-M	Cambodia	peecnic	mum	Escherichia coli	ecoli_achtman_4	7304	ERR14660710	GCA_965178755	CBCXYJ010000001-CBCXYJ010000167
M-M088-B.2	Madagascar	birdy2	neonate	Escherichia coli	ecoli_achtman_4	453	ERR14660789	GCA_965179895	CBCYAR010000001-CBCYAR010000076
C-K443-B	Cambodia	peecnic	neonate	Klebsiella aerogenes	kaerogenes	135	ERR14660717	GCA_965178825	CBCXYB010000001-CBCXYB010000048
M-M022-B	Madagascar	birdy2	neonate	Klebsiella pneumoniae	klebsiella	985	ERR14660776	GCA_965181485	CBCYHJ010000001-CBCYHJ010000055
C-K387-B.2	Cambodia	peecnic	neonate	Klebsiella quasipneumoniae subsp. similipneumoniae	klebsiella	1308	ERR14660685	GCA_965179305	CBCXYS010000001-CBCXYS010000067
M-M157-B	Madagascar	birdy2	neonate	Kluyvera genomospecies	-	-	ERR14686640	GCA_965195765	CBDAHN010000001-CBDAHN010000093
M-M271-B	Madagascar	birdy2	neonate	Leclercia adecarboxylata	-	-	ERR14660839	GCA_965179695	CBCXZU010000001-CBCXZU010000064
M-M052-B.1	Madagascar	birdy2	neonate	Morganella morganii	-	-	ERR14660780	GCA_965180365	CBCYAQ010000001-CBCYAQ010000087
M-M108-M.1	Madagascar	birdy2	mum	Morganella morganii	-	-	ERR14660803	GCA_965183455	CBDAAV010000001-CBDAAV010000068
M-A044-M.2	Madagascar	birdy2	mum	Enterobacter intestinihominis	ecloacae	51	ERR14660922	GCA_965183305	CBDABQ010000001-CBDABQ010000034
M-M117-M	Madagascar	birdy2	mum	Klebsiella pneumoniae	klebsiella	1119	ERR14660965	GCA_965180525	CBCYDU010000001-CBCYDU010000109
M-A074-M	Madagascar	birdy2	mum	Leclercia genomospecies	-	-	ERR14686637	GCA_965195605	CBDAHM010000001-CBDAHM010000041
M-A043-M	Madagascar	birdy2	mum	Morganella morganii	-	-	ERR14660920	GCA_965183335	CBDAAE010000001-CBDAAE010000135
M-Mo210-B	Madagascar	neolic	neonate	Morganella morganii	-	-	ERR14661153	GCA_965182125	CBCYIR010000001-CBCYIR010000144
M-M133-B	Madagascar	birdy2	neonate	Citrobacter freundii	cfreundii	95	ERR14661093	GCA_965181755	CBCYIA010000001-CBCYIA010000101
M-A123-B	Madagascar	birdy2	neonate	Enterobacter kobei	ecloacae	32	ERR14661066	GCA_965183015	CBDABB010000001-CBDABB010000100
M-A237-B	Madagascar	birdy2	neonate	Klebsiella pneumoniae	klebsiella	219	ERR14661073	GCA_965179925	CBCYBW010000001-CBCYBW010000054
M-M138-B	Madagascar	birdy2	neonate	Phytobacter diazotrophicus	-	-	ERR14661096	GCA_965181635	CBCYII010000001-CBCYII010000128
M-M068-B.1	Madagascar	birdy2	neonate	Leclercia adecarboxylata	-	-	ERR14661080	GCA_965180195	CBCYCG010000001-CBCYCG010000083
M-M275-B	Madagascar	birdy2	neonate	Klebsiella quasipneumoniae subsp. similipneumoniae	klebsiella	1605	ERR14661115	GCA_965182885	CBCYNE010000001-CBCYNE010000089
M-M089-B.2	Madagascar	birdy2	neonate	Morganella morganii	-	-	ERR14661086	GCA_965182595	CBCYJK010000001-CBCYJK010000116
M-M004-B	Madagascar	birdy2	neonate	Enterobacter intestinihominis	ecloacae	2895	ERR14661074	GCA_965183005	CBCZQI010000001-CBCZQI010000052
M-M089-B.3	Madagascar	birdy2	neonate	Enterobacter kobei	ecloacae	32	ERR14661087	GCA_965182745	CBCYMM010000001-CBCYMM010000101
M-M257-B	Madagascar	birdy2	neonate	Enterobacter kobei	ecloacae	32	ERR14661113	GCA_965180325	CBCYDA010000001-CBCYDA010000118
M-M191-B	Madagascar	birdy2	neonate	Morganella morganii	-	-	ERR14661106	GCA_965181685	CBCYFQ010000001-CBCYFQ010000159
C-K396-B	Cambodia	peecnic	neonate	Klebsiella pneumoniae	klebsiella	305	ERR14661039	GCA_965181375	CBCYHE010000001-CBCYHE010000058
M-Mo150-B.3	Madagascar	neolic	neonate	Leclercia adecarboxylata	-	-	ERR14661152	GCA_965182135	CBCYJT010000001-CBCYJT010000117
C-P332-B	Cambodia	peecnic	neonate	Escherichia coli	ecoli_achtman_4	131	ERR14660736	GCA_965180775	CBCYEK010000001-CBCYEK010000120
C-K381-M	Cambodia	peecnic	mum	Klebsiella pneumoniae	klebsiella	5112	ERR14660679	GCA_965178925	CBCXZK010000001-CBCXZK010000098
C-K392-B	Cambodia	peecnic	neonate	Klebsiella pneumoniae	klebsiella	152	ERR14660690	GCA_965179255	CBCXZL010000001-CBCXZL010000082
M-A164-B	Madagascar	birdy2	neonate	Lelliottia nimipressuralis	-	-	ERR14661067	GCA_965182145	CBCYIZ010000001-CBCYIZ010000067
C-P361-B	Cambodia	peecnic	neonate	Enterobacter intestinihominis	ecloacae	136	ERR14660755	GCA_965180385	CBCYBS010000001-CBCYBS010000056
